# Supplementary material for: Enhanced Adsorption of Rhodamine B on Biomass of Cypress/False Cypress (Chamaecyparis lawsoniana) Fruit: Optimization and Kinetic Study
Source: MDPI journal article supplement (doi:10.3390/w14192987), 2022-09-23
Supplement: s1 [file s1]

## Supplementary materials

# Enhanced Adsorption of Rhodamine B on Biomass of Cypress/False Cypress (*Chamaecyparis lawsoniana*) Fruit: Optimization and Kinetic Study

Salma Gul <sup>1</sup>, Hajera Gul <sup>2</sup>, Maria Gul <sup>1</sup>, Rozina Khattak <sup>2,\*</sup>, Gul Rukh <sup>1</sup>, Muhammad Sufaid Khan <sup>3</sup> and Hani Amir Aouissi <sup>4</sup>

<sup>1</sup> Department of Chemistry, Women University Swabi, Swabi 22101, Pakistan

<sup>2</sup> Department of Chemistry, Shaheed Benazir Bhutto Women University, Peshawar 25000, Pakistan

<sup>3</sup> Department of Chemistry, University of Malakand, Chakdara 18800, Pakistan

<sup>4</sup> Scientific and Technical Research Center on Arid Regions (CRSTRA), Biskra 07000, Algeria

\* Correspondence: rznkhattak@sbbwu.edu.pk (R.K.); rznkhattak@yahoo.com (R.K.)

**Citation:** Gul, S.; Gul, H.; Gul, M.; Khattak, R.; Rukh, G.; Khan, M.S.; Aouissi, H.A. Enhanced Adsorption of Rhodamine B on Biomass of Cypress/False Cypress (*Chamaecyparis lawsoniana*) Fruit: Optimization and Kinetic Study. *Water* **2022**, *14*, 2987. <https://doi.org/10.3390/w14192987>

Academic Editor: Laura Bulgariu

Received: 8 August 2022

Accepted: 19 September 2022

Published: 23 September 2022

**Publisher's Note:** MDPI stays neutral with regard to jurisdictional claims in published maps and institutional affiliations.

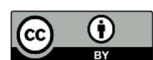

**Copyright:** © 2022 by the authors. Licensee MDPI, Basel, Switzerland. This article is an open access article distributed under the terms and conditions of the Creative Commons Attribution (CC BY) license (<https://creativecommons.org/licenses/by/4.0/>).

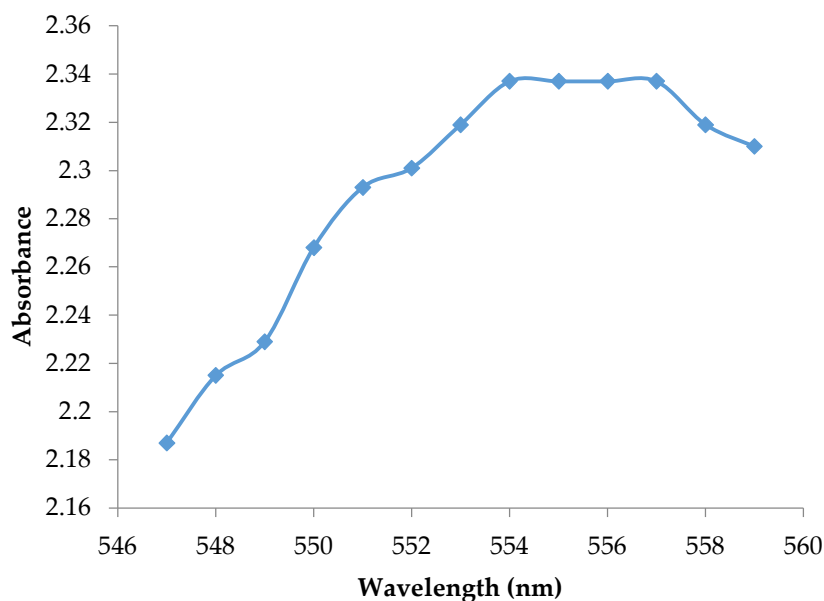

**Figure S1.** Absorbance as a function of wavelength for aqueous solution of RhB dye.
