# Supplementary material for: Enhanced Adsorption of Rhodamine B on Biomass of Cypress/False Cypress (Chamaecyparis lawsoniana) Fruit: Optimization and Kinetic Study
Source: MDPI journal article supplement (doi:10.3390/w14192987), 2022-09-23
Supplement: s1 [file s1]

Archive with 1 entries (1 files):
- water-1881367-supplementary.pdf
